# Supplementary material for: Metabolomic profiling of cancer-related fatigue involved in cachexia and chemotherapy
Source: Springer Nature journal article supplement (doi:10.1038/s41598-024-57747-y), 2024-04-09
Supplement: MOESM2 [file 41598_2024_57747_MOESM2_ESM.pdf]

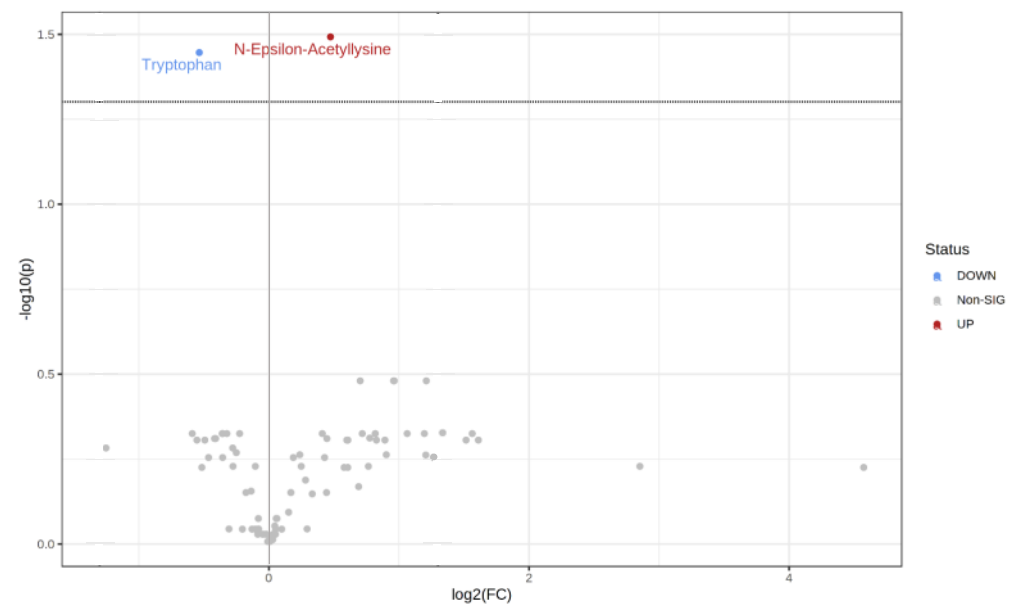

$$FC = F/NF$$
